# Supplementary material for: Functional Group Effects on the Photoelectronic Properties of MXene (Sc2CT2, T = O, F, OH) and Their Possible Photocatalytic Activities
Source: PubMed Central journal article supplement (PMC5678094; doi:10.1038/s41598-017-15233-8), 2017-11-08
Supplement: 41598_2017_15233_MOESM1_ESM.pdf [file 41598_2017_15233_MOESM1_ESM.pdf]

Supporting Information

# Functional Group Effects on the Photoelectronic Properties of MXene ( $\text{Sc}_2\text{CT}_2$ , T = O, F or OH) and Their Possible Photocatalytic Activities

Kuangwei Xiong<sup>1,2</sup>, Peihong Wang<sup>1</sup>, Guang Yang<sup>3</sup>, Zhongfei Liu<sup>1</sup>, Haijun Zhang<sup>1,\*</sup>, Shaowei Jin<sup>1,\*</sup>, Xin Xu<sup>4</sup>

<sup>1</sup>School of Physics and Materials Science, Anhui Key Laboratory of Information Materials and Devices, Anhui University, Hefei 230601, PR China

<sup>2</sup>Department of Physics, East China Jiaotong University, Nanchang 330013, PR China

<sup>3</sup>College of Energy and Environmental Engineering, Hebei University of Engineering, Handan 056038, Hebei Province, PR China

<sup>4</sup>School of Mathematics Science, Anhui University, Hefei 230601, China

E-mail: [hjzhang\\_ahu@163.com](mailto:hjzhang_ahu@163.com); [jinsw@mail.ustc.edu.cn](mailto:jinsw@mail.ustc.edu.cn).

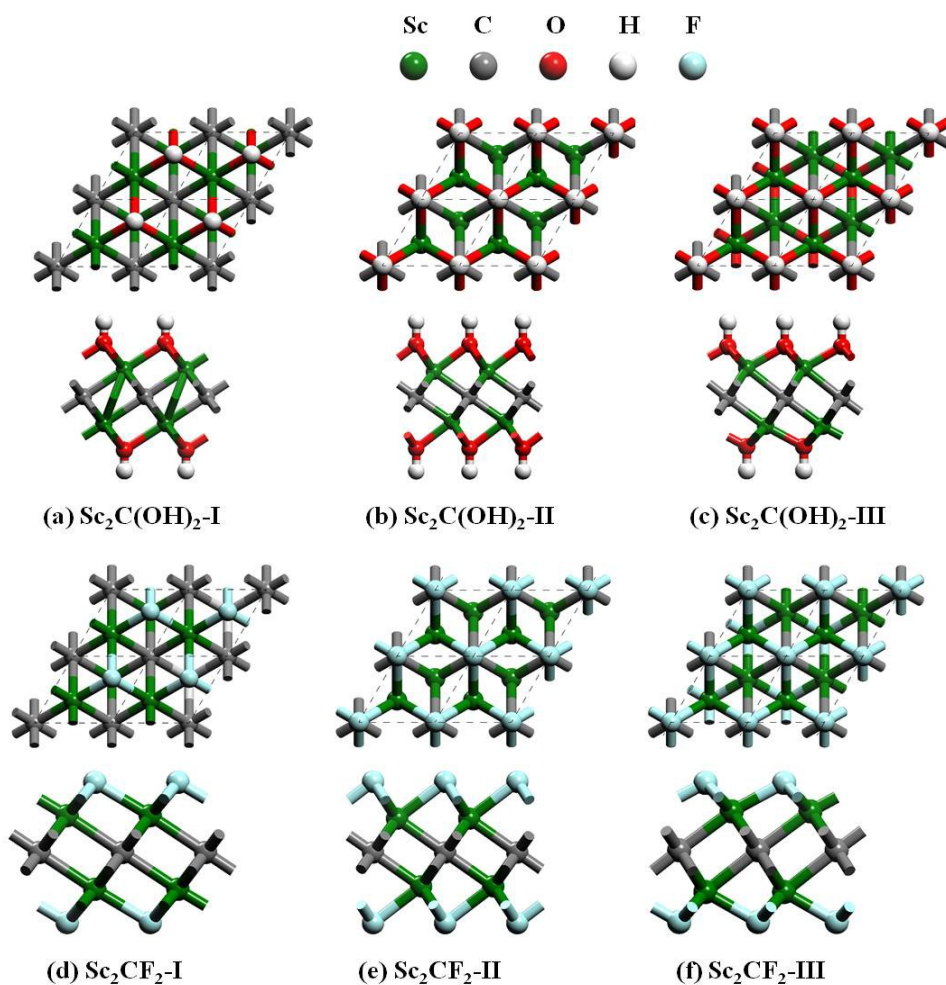

**Fig S1** Top view (upper) and side view (lower) of the geometries for (a-c)  $\text{Sc}_2\text{C}(\text{OH})_2\text{-I, II, III}$ ; (d-f)  $\text{Sc}_2\text{CF}_2\text{-I, II, III}$ .

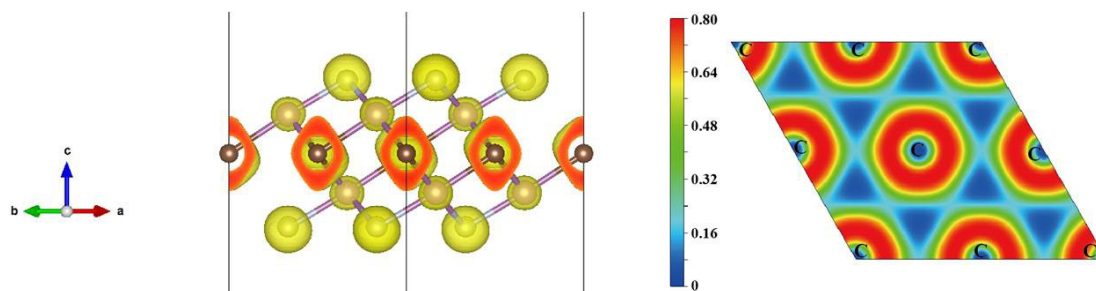

**Fig S2** ELF isosurfaces (left) plotted with the value of 0.75 au and ELF map (right) for the  $\text{Sc}_2\text{CF}_2\text{-I}$ . In the ELF map, the red and blue represent the highest (0.8) and lowest value (0) of ELF.

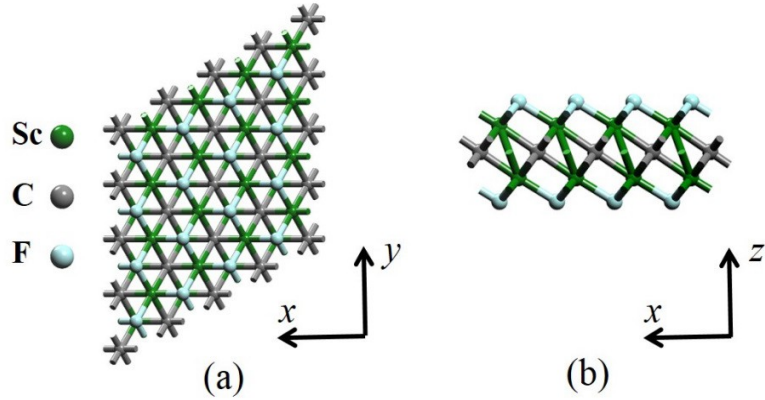

**Fig S3** a  $2 \times 2$  supercell of the  $\text{Sc}_2\text{CF}_2\text{-I}$  monolayer MXene.

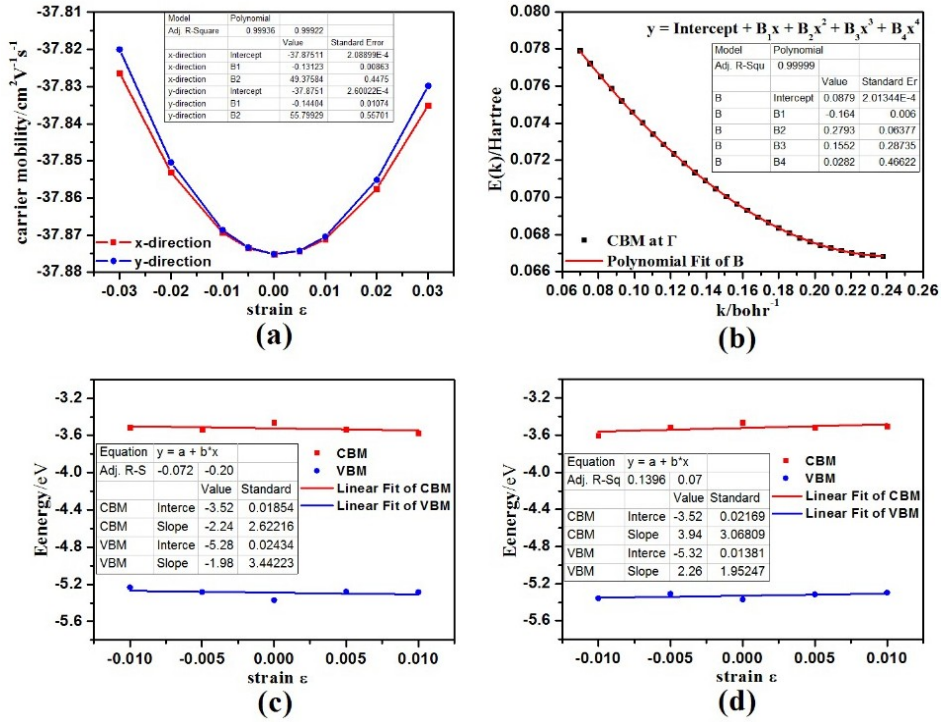

**Fig S4** the  $\text{Sc}_2\text{CF}_2\text{-I}$ : the relationship between (a) the total energy and uniaxial strain along x direction and y direction, (b) The energy  $E(k)$  and the wave vector  $k$  near the CBM along x direction. Band edge position shift with respect to the uniaxial strain along (c) x direction, (d) y direction. The red and blue solid lines are the fittings to the data.

**Table S1** Vacuum level, CBM and VBM levels (in V) for Sc<sub>2</sub>C(OH)<sub>2</sub>-I and Sc<sub>2</sub>CF<sub>2</sub>-I MXenes.  $E_{CBM}$  and  $E_{VBM}$  are band edge positions, which are listed relative to the Fermi level, vacuum level and normal hydrogen electrode ( $E_{NHE} = -4.5$  V), respectively.

|                                       | Vacuum level | $E_{CBM}$ |        |        | $E_{VBM}$ |        |        |
|---------------------------------------|--------------|-----------|--------|--------|-----------|--------|--------|
|                                       |              | $V_S$     | $V_S$  | $V_S$  | $V_S$     | $V_S$  | $V_S$  |
|                                       |              | fermi     | vacuum | NHE    | fermi     | vacuum | NHE    |
| Sc <sub>2</sub> C(OH) <sub>2</sub> -I | 1.472        | 0.701     | -0.763 | -3.737 | -0.105    | -1.568 | -2.932 |
| Sc <sub>2</sub> CF <sub>2</sub> -I    | 2.258        | 1.805     | -3.462 | -1.038 | -0.103    | -5.37  | 0.87   |

**Table S2** Effective mass  $|m^*|$ , DP constant  $E_I$ , xy-plane elastic modulus C, and carrier mobility  $\mu$  for electrons and holes along the x and y directions in the Sc<sub>2</sub>C(OH)<sub>2</sub>-I and Sc<sub>2</sub>CF<sub>2</sub>-I MXene.

|                                       |              | $m^* (m_e)$ | $C(N/m)$ | $E_I(eV)$ | $\mu(cm^2 V^{-1} S^{-1})$ |
|---------------------------------------|--------------|-------------|----------|-----------|---------------------------|
| Sc <sub>2</sub> C(OH) <sub>2</sub> -I | Electrons(x) | 0.38        | 170.48   | 3.28      | 1558                      |
|                                       | Hole(x)      | 1.65        | 170.48   | -4.28     | 46                        |
|                                       | Electrons(y) | 0.38        | 192.24   | 3.92      | 1230                      |
|                                       | Hole(y)      | 1.65        | 192.24   | 4.92      | 41                        |
| Sc <sub>2</sub> CF <sub>2</sub> -I    | Electrons(x) | 0.62        | 169.43   | -2.24     | 1288                      |
|                                       | Hole(x)      | 2.1         | 169.43   | -1.98     | 139                       |
|                                       | Electrons(y) | 0.58        | 191.47   | 3.94      | 520                       |
|                                       | Hole(y)      | 2.5         | 191.47   | 2.26      | 85                        |

### Computational Details of the Carrier Mobility:

As an example, we give the calculation process of the electron carrier mobility  $\mu$  along x direction of the Sc<sub>2</sub>CF<sub>2</sub>-I. To obtain the elastic modulus C and deformation potential constant  $E_1$ , we calculated the total energy and band edge positions as a function of the uniaxial strain  $\epsilon$  as shown in Fig. S4 a, c and d. All the calculated results are listed in Table S2.

As for the effective mass, we plot a curve about the relationship between the energy  $E(k)$  and the wave vector  $k$  with thirty high-density k points near the CBM (Fig. S4 b), then adopted a fourth order polynomial function to fit this curve:

$$y = \text{Intercept} + B_1x + B_2x^2 + B_3x^3 + B_4x^4$$

The second derivative value of the fitting function:

$$\left. \frac{\partial^2 y}{\partial x^2} \right|_{x=M} = 2B_2 + 6B_3x + 12B_4x^2 \Big|_{x=M}$$

According to the definition of carrier effective mass, the electron effective mass along x direction can be calculated.

$$m^* = \hbar^2 / (\partial^2 E(k) / \partial k^2)$$
